# Supplementary material
Source: ML conference proceedings conference paper supplement (https://aclanthology.org/2020.emnlp-demos.7)
Supplement: OptionalSupplementaryMaterial [file 2020.emnlp-demos.7.OptionalSupplementaryMaterial.zip]

Archive with 15 entries (15 files):
- acl_natbib.bst
- emnlp2020.bbl
- emnlp2020.bib
- emnlp2020.pdf
- emnlp2020.sty
- emnlp2020.tex
- img/AdapterHub.pdf
- img/AdapterHubCombined.pdf
- img/AdapterHubCombined_houlsby.pdf
- img/AdapterHubCombined_left.pdf
- img/AdapterHubCombined_pfeiffer.pdf
- img/Logo.png
- img/Process.pdf
- img/Process_paper.pdf
- img/screen_search.png
