# Supplementary material
Source: ML conference proceedings conference paper supplement (https://aclanthology.org/2020.emnlp-demos.7)
Supplement: OptionalSupplementaryMaterial [file 2020.emnlp-demos.7.OptionalSupplementaryMaterial.zip › emnlp2020.bbl]

\begin{thebibliography}{42}
\expandafter\ifx\csname natexlab\endcsname\relax\def\natexlab#1{#1}\fi

\bibitem[{Andreas et~al.(2016)Andreas, Rohrbach, Darrell, and
  Klein}]{Andreas2016learningtocompose}
Jacob Andreas, Marcus Rohrbach, Trevor Darrell, and Dan Klein. 2016.
\newblock \href {http://arxiv.org/abs/arXiv:1601.01705v1} {{Learning to Compose
  Neural Networks for Question Answering}}.
\newblock In \emph{Proceedings of NAACL 2016}.

\bibitem[{Ba et~al.(2016)Ba, Kiros, and Hinton}]{Ba16_LayerNorm}
Lei~Jimmy Ba, Jamie~Ryan Kiros, and Geoffrey~E. Hinton. 2016.
\newblock \href {http://arxiv.org/abs/1607.06450} {Layer normalization}.
\newblock \emph{arXiv preprint}.

\bibitem[{Bapna and Firat(2019)}]{Bapna2019adapters}
Ankur Bapna and Orhan Firat. 2019.
\newblock \href {https://doi.org/10.18653/v1/D19-1165} {Simple, scalable
  adaptation for neural machine translation}.
\newblock In \emph{Proceedings of EMNLP-IJCNLP 2019}.

\bibitem[{Bar-Haim et~al.(2006)Bar-Haim, Dagan, Dolan, Ferro, Giampiccolo,
  Magnini, and Szpektor}]{bar2006second}
Roy Bar-Haim, Ido Dagan, Bill Dolan, Lisa Ferro, Danilo Giampiccolo, Bernardo
  Magnini, and Idan Szpektor. 2006.
\newblock The second pascal recognising textual entailment challenge.
\newblock In \emph{Proceedings of the PASCAL@ACL 2006}.

\bibitem[{Brown et~al.(2020)Brown, Mann, Ryder, Subbiah, Kaplan, Dhariwal,
  Neelakantan, Shyam, Sastry, Askell, Agarwal, Herbert{-}Voss, Krueger,
  Henighan, Child, Ramesh, Ziegler, Wu, Winter, Hesse, Chen, Sigler, Litwin,
  Gray, Chess, Clark, Berner, McCandlish, Radford, Sutskever, and
  Amodei}]{Brown:2020gpt3}
Tom~B. Brown, Benjamin Mann, Nick Ryder, Melanie Subbiah, Jared Kaplan,
  Prafulla Dhariwal, Arvind Neelakantan, Pranav Shyam, Girish Sastry, Amanda
  Askell, Sandhini Agarwal, Ariel Herbert{-}Voss, Gretchen Krueger, Tom
  Henighan, Rewon Child, Aditya Ramesh, Daniel~M. Ziegler, Jeffrey Wu, Clemens
  Winter, Christopher Hesse, Mark Chen, Eric Sigler, Mateusz Litwin, Scott
  Gray, Benjamin Chess, Jack Clark, Christopher Berner, Sam McCandlish, Alec
  Radford, Ilya Sutskever, and Dario Amodei. 2020.
\newblock \href {https://arxiv.org/abs/2005.14165} {Language models are
  few-shot learners}.
\newblock \emph{arXiv preprint}.

\bibitem[{Cer et~al.(2017)Cer, Diab, Agirre, Lopez-Gazpio, and
  Specia}]{cer2017semeval}
Daniel Cer, Mona Diab, Eneko Agirre, I{\~n}igo Lopez-Gazpio, and Lucia Specia.
  2017.
\newblock \href {https://doi.org/10.18653/v1/S17-2001} {{S}em{E}val-2017 task
  1: Semantic textual similarity multilingual and crosslingual focused
  evaluation}.
\newblock In \emph{Proceedings of {S}em{E}val-2017}.

\bibitem[{Conneau et~al.(2020)Conneau, Khandelwal, Goyal, Chaudhary, Wenzek,
  Guzm{\'{a}}n, Grave, Ott, Zettlemoyer, and Stoyanov}]{Conneau2020xlm-r}
Alexis Conneau, Kartikay Khandelwal, Naman Goyal, Vishrav Chaudhary, Guillaume
  Wenzek, Francisco Guzm{\'{a}}n, Edouard Grave, Myle Ott, Luke Zettlemoyer,
  and Veselin Stoyanov. 2020.
\newblock \href {http://arxiv.org/abs/1911.02116} {Unsupervised cross-lingual
  representation learning at scale}.
\newblock In \emph{Proceedings of ACL 2020}.

\bibitem[{Dagan et~al.(2005)Dagan, Glickman, and Magnini}]{dagan2005pascal}
Ido Dagan, Oren Glickman, and Bernardo Magnini. 2005.
\newblock \href {https://doi.org/10.1007/11736790\_9} {The pascal recognising
  textual entailment challenge}.
\newblock In \emph{{PASCAL} {MLCW} 2005}.

\bibitem[{Devlin et~al.(2019)Devlin, Chang, Lee, and
  Toutanova}]{Devlin2019bert}
Jacob Devlin, Ming{-}Wei Chang, Kenton Lee, and Kristina Toutanova. 2019.
\newblock \href {https://doi.org/10.18653/v1/n19-1423} {{BERT:} pre-training of
  deep bidirectional transformers for language understanding}.
\newblock In \emph{Proceedings of NAACL 2019}.

\bibitem[{Dolan and Brockett(2005)}]{dolan2005automatically}
William~B Dolan and Chris Brockett. 2005.
\newblock \href {https://www.aclweb.org/anthology/I05-5002/} {Automatically
  constructing a corpus of sentential paraphrases}.
\newblock In \emph{Proceedings of IWP@IJCNLP 2005}.

\bibitem[{Giampiccolo et~al.(2007)Giampiccolo, Magnini, Dagan, and
  Dolan}]{giampiccolo2007third}
Danilo Giampiccolo, Bernardo Magnini, Ido Dagan, and Bill Dolan. 2007.
\newblock The third pascal recognizing textual entailment challenge.
\newblock In \emph{Proceedings of the PASCAL@ACL 2007}.

\bibitem[{Gururangan et~al.(2020)Gururangan, Marasovi{\'c}, Swayamdipta, Lo,
  Beltagy, Downey, and Smith}]{gururangan2020don}
Suchin Gururangan, Ana Marasovi{\'c}, Swabha Swayamdipta, Kyle Lo, Iz~Beltagy,
  Doug Downey, and Noah~A Smith. 2020.
\newblock \href {https://www.aclweb.org/anthology/2020.acl-main.740.pdf} {Don't
  stop pretraining: Adapt language models to domains and tasks}.
\newblock In \emph{Proceedings of ACL 2020}.

\bibitem[{Hashimoto et~al.(2017)Hashimoto, Xiong, Tsuruoka, and
  Socher}]{Hashimoto2017ajointmanytask}
Kazuma Hashimoto, Caiming Xiong, Yoshimasa Tsuruoka, and Richard Socher. 2017.
\newblock \href {http://arxiv.org/abs/1611.01587} {{A Joint Many-Task Model:
  Growing a Neural Network for Multiple NLP Tasks}}.
\newblock In \emph{Proceedings of EMNLP 2017}.

\bibitem[{Houlsby et~al.(2019)Houlsby, Giurgiu, Jastrz{k{e}}bski, Morrone,
  de~Laroussilhe, Gesmundo, Attariyan, and Gelly}]{Houlsby2019adapters}
Neil Houlsby, Andrei Giurgiu, Stanis{l}aw Jastrz{k{e}}bski, Bruna Morrone,
  Quentin de~Laroussilhe, Andrea Gesmundo, Mona Attariyan, and Sylvain Gelly.
  2019.
\newblock \href {http://proceedings.mlr.press/v97/houlsby19a.html}
  {Parameter-efficient transfer learning for {NLP}}.
\newblock In \emph{Proceedings of ICML 2019}.

\bibitem[{Howard and Ruder(2018)}]{Howard2018ulmfit}
Jeremy Howard and Sebastian Ruder. 2018.
\newblock \href {https://doi.org/10.18653/v1/P18-1031} {{Universal Language
  Model Fine-tuning for Text Classification}}.
\newblock In \emph{Proceedings of ACL 2018}.

\bibitem[{Iyer et~al.(2017)Iyer, Dandekar, and Csernai}]{WinNT}
Shankar Iyer, Nikhil Dandekar, and Kornel Csernai. 2017.
\newblock \href
  {https://data.quora.com/First-Quora-Dataset-Release-Question-Pairs} {First
  quora dataset release: Question pairs}.

\bibitem[{Kaplan et~al.(2020)Kaplan, McCandlish, Henighan, Brown, Chess, Child,
  Gray, Radford, Wu, and Amodei}]{Kaplan2020scalinglaws}
Jared Kaplan, Sam McCandlish, Tom Henighan, Tom~B. Brown, Benjamin Chess, Rewon
  Child, Scott Gray, Alec Radford, Jeffrey Wu, and Dario Amodei. 2020.
\newblock \href {https://arxiv.org/abs/2001.08361} {{Scaling Laws for Neural
  Language Models}}.
\newblock \emph{arXiv preprint}.

\bibitem[{Lauscher et~al.(2019)Lauscher, Vuli\'{c}, Ponti, Korhonen, and
  Glava\v{s}}]{Lauscher:2019libert}
Anne Lauscher, Ivan Vuli\'{c}, Edoardo~Maria Ponti, Anna Korhonen, and Goran
  Glava\v{s}. 2019.
\newblock \href {http://arxiv.org/abs/1909.02339} {Specializing unsupervised
  pretraining models for word-level semantic similarity}.
\newblock \emph{arXiv preprint}.

\bibitem[{Liu et~al.(2019)Liu, Ott, Goyal, Du, Joshi, Chen, Levy, Lewis,
  Zettlemoyer, and Stoyanov}]{liu2019roberta}
Yinhan Liu, Myle Ott, Naman Goyal, Jingfei Du, Mandar Joshi, Danqi Chen, Omer
  Levy, Mike Lewis, Luke Zettlemoyer, and Veselin Stoyanov. 2019.
\newblock \href {https://arxiv.org/abs/1907.11692} {Roberta: A robustly
  optimized bert pretraining approach}.
\newblock \emph{arXiv preprint}.

\bibitem[{Masson et~al.(2019)Masson, Ruder, Kong, and
  Yogatama}]{Masson2019episodicmemory}
Cyprien~De Masson, Sebastian Ruder, Lingpeng Kong, and Dani Yogatama. 2019.
\newblock \href
  {http://papers.nips.cc/paper/9471-episodic-memory-in-lifelong-language-learning}
  {{Episodic Memory in Lifelong Language Learning}}.
\newblock In \emph{Advances in NeurIPS 2019}.

\bibitem[{Peters et~al.(2019)Peters, Ruder, and Smith}]{peters2019tune}
Matthew~E. Peters, Sebastian Ruder, and Noah~A. Smith. 2019.
\newblock \href {https://doi.org/10.18653/v1/w19-4302} {To tune or not to tune?
  adapting pretrained representations to diverse tasks}.
\newblock In \emph{Proceedings of the RepL4NLP@ACL 2019}.

\bibitem[{Pfeiffer et~al.(2020{\natexlab{a}})Pfeiffer, Kamath,
  R{\"{u}}ckl{\'{e}}, Cho, and Gurevych}]{Pfeiffer2020adapterfusion}
Jonas Pfeiffer, Aishwarya Kamath, Andreas R{\"{u}}ckl{\'{e}}, Kyunghyun Cho,
  and Iryna Gurevych. 2020{\natexlab{a}}.
\newblock \href {https://arxiv.org/pdf/2005.00247.pdf} {{AdapterFusion}:
  Non-destructive task composition for transfer learning}.
\newblock \emph{arXiv preprint}.

\bibitem[{Pfeiffer et~al.(2020{\natexlab{b}})Pfeiffer, Vuli\'{c}, Gurevych, and
  Ruder}]{pfeiffer20madx}
Jonas Pfeiffer, Ivan Vuli\'{c}, Iryna Gurevych, and Sebastian Ruder.
  2020{\natexlab{b}}.
\newblock \href {https://arxiv.org/pdf/2005.00052.pdf} {{MAD-X}: An
  {A}dapter-based {F}ramework for {M}ulti-task {C}ross-lingual {T}ransfer}.
\newblock In \emph{Proceedings of EMNLP 2020}.

\bibitem[{Phang et~al.(2018)Phang, F{\'e}vry, and Bowman}]{phang2018sentence}
Jason Phang, Thibault F{\'e}vry, and Samuel~R Bowman. 2018.
\newblock \href {http://arxiv.org/abs/1811.01088} {Sentence encoders on stilts:
  Supplementary training on intermediate labeled-data tasks}.
\newblock \emph{arXiv preprint}.

\bibitem[{Pruksachatkun et~al.(2020)Pruksachatkun, Phang, Liu, Htut, Zhang,
  Pang, Vania, Kann, and Bowman}]{Pruksachatkun2020}
Yada Pruksachatkun, Jason Phang, Haokun Liu, Phu~Mon Htut, Xiaoyi Zhang,
  Richard~Yuanzhe Pang, Clara Vania, Katharina Kann, and Samuel~R. Bowman.
  2020.
\newblock \href {http://arxiv.org/abs/2005.00628} {{Intermediate-Task Transfer
  Learning with Pretrained Models for Natural Language Understanding: When and
  Why Does It Work?}}
\newblock In \emph{Proceedings of ACL 2020}.

\bibitem[{Raffel et~al.(2019)Raffel, Shazeer, Roberts, Lee, Narang, Matena,
  Zhou, Li, and Liu}]{Raffel2019t3}
Colin Raffel, Noam Shazeer, Adam Roberts, Katherine Lee, Sharan Narang, Michael
  Matena, Yanqi Zhou, Wei Li, and Peter~J. Liu. 2019.
\newblock \href {http://arxiv.org/abs/1910.10683} {{Exploring the Limits of
  Transfer Learning with a Unified Text-to-Text Transformer}}.
\newblock \emph{arXiv preprint}.

\bibitem[{Rajpurkar et~al.(2016)Rajpurkar, Zhang, Lopyrev, and
  Liang}]{rajpurkar2016squad}
Pranav Rajpurkar, Jian Zhang, Konstantin Lopyrev, and Percy Liang. 2016.
\newblock \href {https://doi.org/10.18653/v1/d16-1264} {{SQuAD: 100,000+
  Questions for Machine Comprehension of Text}}.
\newblock In \emph{Proceedings of EMNLP 2016}.

\bibitem[{Rebuffi et~al.(2017)Rebuffi, Bilen, and
  Vedaldi}]{rebuffi2017learning}
Sylvestre{-}Alvise Rebuffi, Hakan Bilen, and Andrea Vedaldi. 2017.
\newblock \href
  {http://papers.nips.cc/paper/6654-learning-multiple-visual-domains-with-residual-adapters}
  {Learning multiple visual domains with residual adapters}.
\newblock In \emph{Advances in NeurIPS 2017}.

\bibitem[{R{\"{u}}ckl{\'{e}} et~al.(2020)R{\"{u}}ckl{\'{e}}, Glockner, Geigle,
  Beck, Pfeiffer, Reimers, and Gurevych}]{rueckle2020adapterdrop}
Andreas R{\"{u}}ckl{\'{e}}, Max Glockner, Gregor Geigle, Tilman Beck, Jonas
  Pfeiffer, Nils Reimers, and Iryna Gurevych. 2020.
\newblock {AdapterDrop: On the Efficiency of Adapters in Transformers}.
\newblock \emph{arXiv preprint}.

\bibitem[{Ruder(2017)}]{Ruder2017}
Sebastian Ruder. 2017.
\newblock \href {http://arxiv.org/abs/arXiv:1706.05098v1} {{An Overview of
  Multi-Task Learning in Deep Neural Networks}}.
\newblock \emph{arXiv preprint}.

\bibitem[{Ruder et~al.(2019)Ruder, Peters, Swayamdipta, and
  Wolf}]{ruder2019transfer}
Sebastian Ruder, Matthew~E Peters, Swabha Swayamdipta, and Thomas Wolf. 2019.
\newblock \href {https://www.aclweb.org/anthology/N19-5004.pdf} {Transfer
  learning in natural language processing}.
\newblock In \emph{Proceedings of NAACL 2019: Tutorials}.

\bibitem[{Sanh et~al.(2019)Sanh, Wolf, and Ruder}]{Sanh2019hierarchical}
Victor Sanh, Thomas Wolf, and Sebastian Ruder. 2019.
\newblock \href {http://arxiv.org/abs/arXiv:1811.06031v1} {{A Hierarchical
  Multi-task Approach for Learning Embeddings from Semantic Tasks}}.
\newblock In \emph{Proceedings of AAAI 2019}.

\bibitem[{Shazeer et~al.(2017)Shazeer, Mirhoseini, Maziarz, Davis, Le, and
  Dean}]{Shazeer2017mixtureofexperts}
Noam Shazeer, Azalia Mirhoseini, Krzysztof Maziarz, Andy Davis, Quoc Le, and
  Jeff Dean. 2017.
\newblock \href {https://openreview.net/forum?id=B1ckMDqlg} {{Outrageously
  Large Neural Networks: The Sparsely-Gated Mixture-of-Experts Layer}}.
\newblock In \emph{Proceedings of ICLR 2017}.

\bibitem[{Socher et~al.(2013)Socher, Perelygin, Wu, Chuang, Manning, Ng, and
  Potts}]{socher2013-sst}
Richard Socher, Alex Perelygin, Jean Wu, Jason Chuang, Christopher~D. Manning,
  Andrew Ng, and Christopher Potts. 2013.
\newblock \href {https://www.aclweb.org/anthology/D13-1170} {Recursive deep
  models for semantic compositionality over a sentiment treebank}.
\newblock In \emph{Proceedings of EMNLP 2013}.

\bibitem[{Stickland and Murray(2019)}]{pmlr-v97-stickland19a}
Asa~Cooper Stickland and Iain Murray. 2019.
\newblock \href {http://proceedings.mlr.press/v97/stickland19a.html} {{BERT}
  and {PAL}s: Projected attention layers for efficient adaptation in multi-task
  learning}.
\newblock In \emph{Proceedings of ICML 2019}.

\bibitem[{Strubell et~al.(2019)Strubell, Ganesh, and McCallum}]{StrubellGM19}
Emma Strubell, Ananya Ganesh, and Andrew McCallum. 2019.
\newblock \href {https://doi.org/10.18653/v1/p19-1355} {Energy and policy
  considerations for deep learning in {NLP}}.
\newblock In \emph{Proceedings of ACL 2019}.

\bibitem[{Vaswani et~al.(2017)Vaswani, Shazeer, Parmar, Uszkoreit, Jones,
  Gomez, Kaiser, and Polosukhin}]{Vaswani2017transformer}
Ashish Vaswani, Noam Shazeer, Niki Parmar, Jakob Uszkoreit, Llion Jones,
  Aidan~N. Gomez, Lukasz Kaiser, and Illia Polosukhin. 2017.
\newblock \href {http://papers.nips.cc/paper/7181-attention-is-all-you-need}
  {{Attention Is All You Need}}.
\newblock In \emph{Advances in NeurIPS 2017}.

\bibitem[{Wang et~al.(2018)Wang, Singh, Michael, Hill, Levy, and
  Bowman}]{wang18glue}
Alex Wang, Amanpreet Singh, Julian Michael, Felix Hill, Omer Levy, and
  Samuel~R. Bowman. 2018.
\newblock \href {https://doi.org/10.18653/v1/w18-5446} {{GLUE:} {A} multi-task
  benchmark and analysis platform for natural language understanding}.
\newblock In \emph{Proceedings of BlackboxNLP@EMNLP 2018}.

\bibitem[{Wang et~al.(2020)Wang, Tang, Duan, Wei, Huang, Ji, Cao, Jiang, and
  Zhou}]{Wang20kadapters}
Ruize Wang, Duyu Tang, Nan Duan, Zhongyu Wei, Xuanjing Huang, Jianshu Ji,
  Guihong Cao, Daxin Jiang, and Ming Zhou. 2020.
\newblock \href {http://arxiv.org/abs/2002.01808} {K-adapter: Infusing
  knowledge into pre-trained models with adapters}.
\newblock \emph{arXiv preprint}.

\bibitem[{Warstadt et~al.(2019)Warstadt, Singh, and
  Bowman}]{warstadt2018neural}
Alex Warstadt, Amanpreet Singh, and Samuel~R Bowman. 2019.
\newblock \href {https://www.aclweb.org/anthology/N19-5004.pdf} {Neural network
  acceptability judgments}.
\newblock \emph{Transactions of the ACL 2019}.

\bibitem[{Williams et~al.(2018)Williams, Nangia, and Bowman}]{Williams18MNLI}
Adina Williams, Nikita Nangia, and Samuel~R. Bowman. 2018.
\newblock \href {https://doi.org/10.18653/v1/n18-1101} {A broad-coverage
  challenge corpus for sentence understanding through inference}.
\newblock In \emph{Proceedings NAACL-HLT 2018}.

\bibitem[{Wolf et~al.(2019)Wolf, Debut, Sanh, Chaumond, Delangue, andArt
  Pierric~Cistac, Rault, Louf, Funtowicz, and Brew}]{Wolf2019transformers}
Thomas Wolf, Lysandre Debut, Victor Sanh, Julien Chaumond, Clement Delangue,
  Anthony~Moi andArt Pierric~Cistac, Tim Rault, R{\'{e}}mi Louf, Morgan
  Funtowicz, and Jamie Brew. 2019.
\newblock \href {http://arxiv.org/abs/1910.03771} {{HuggingFace's Transformers:
  State-of-the-art Natural Language Processing}}.
\newblock In \emph{Proceedings of EMNLP 2020: Systems Demonstrations}.

\end{thebibliography}
