# Supplementary material
Source: ML conference proceedings conference paper supplement (https://aclanthology.org/2020.emnlp-demos.7)

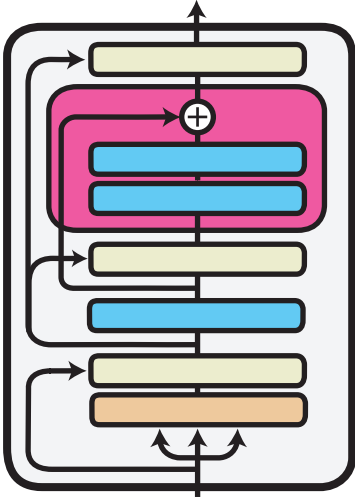

Supplement: OptionalSupplementaryMaterial [file 2020.emnlp-demos.7.OptionalSupplementaryMaterial.zip]

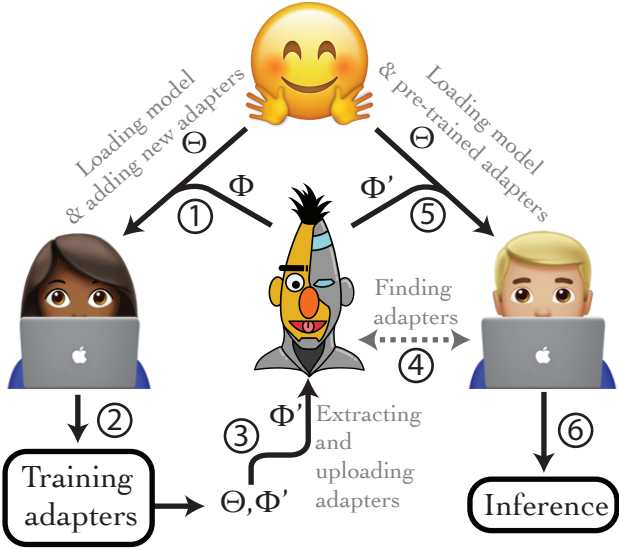

Supplement: OptionalSupplementaryMaterial [file 2020.emnlp-demos.7.OptionalSupplementaryMaterial.zip]

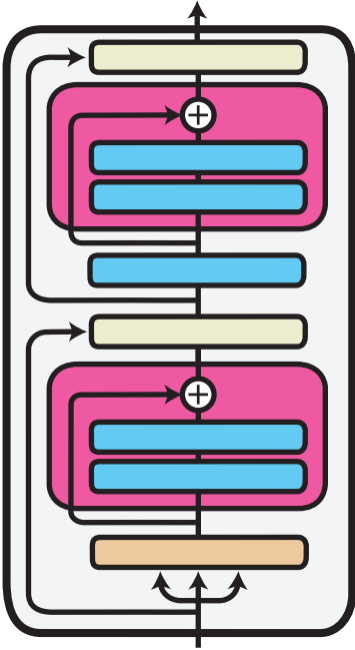

Supplement: OptionalSupplementaryMaterial [file 2020.emnlp-demos.7.OptionalSupplementaryMaterial.zip]

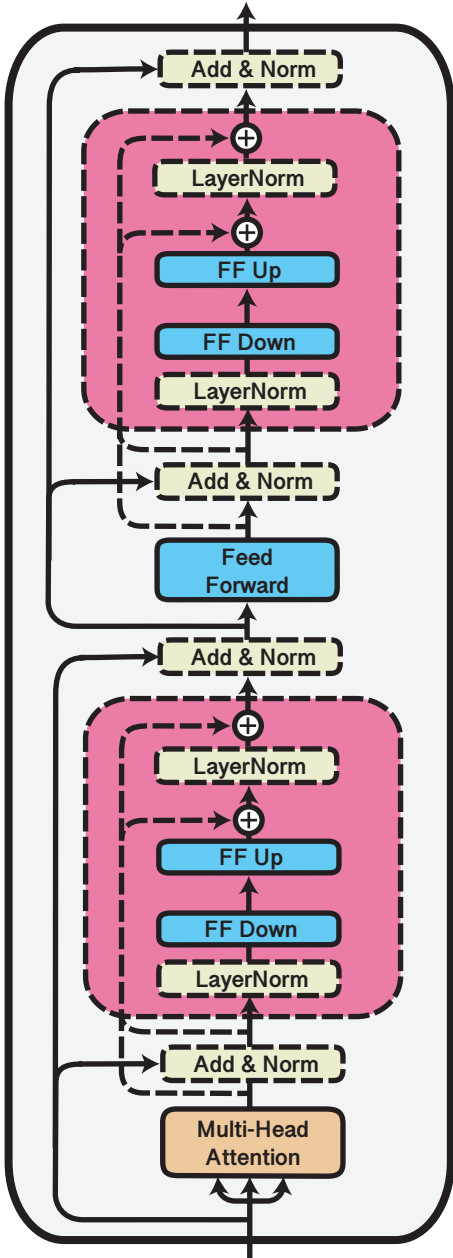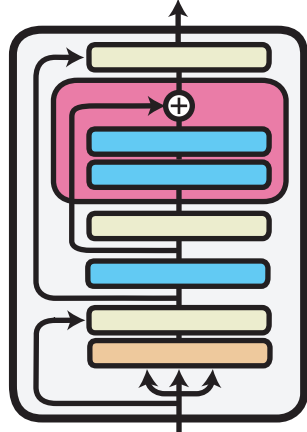

Pfeiffer Architecture

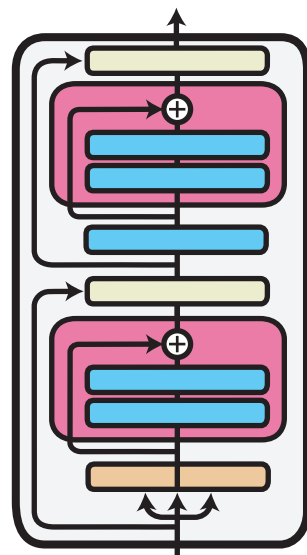

Houlsby Architecture

Supplement: OptionalSupplementaryMaterial [file 2020.emnlp-demos.7.OptionalSupplementaryMaterial.zip]

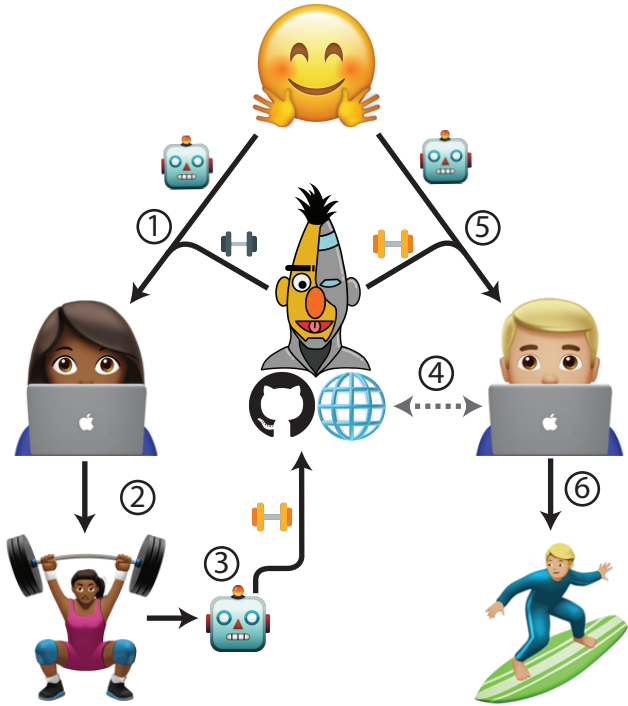

Supplement: OptionalSupplementaryMaterial [file 2020.emnlp-demos.7.OptionalSupplementaryMaterial.zip]

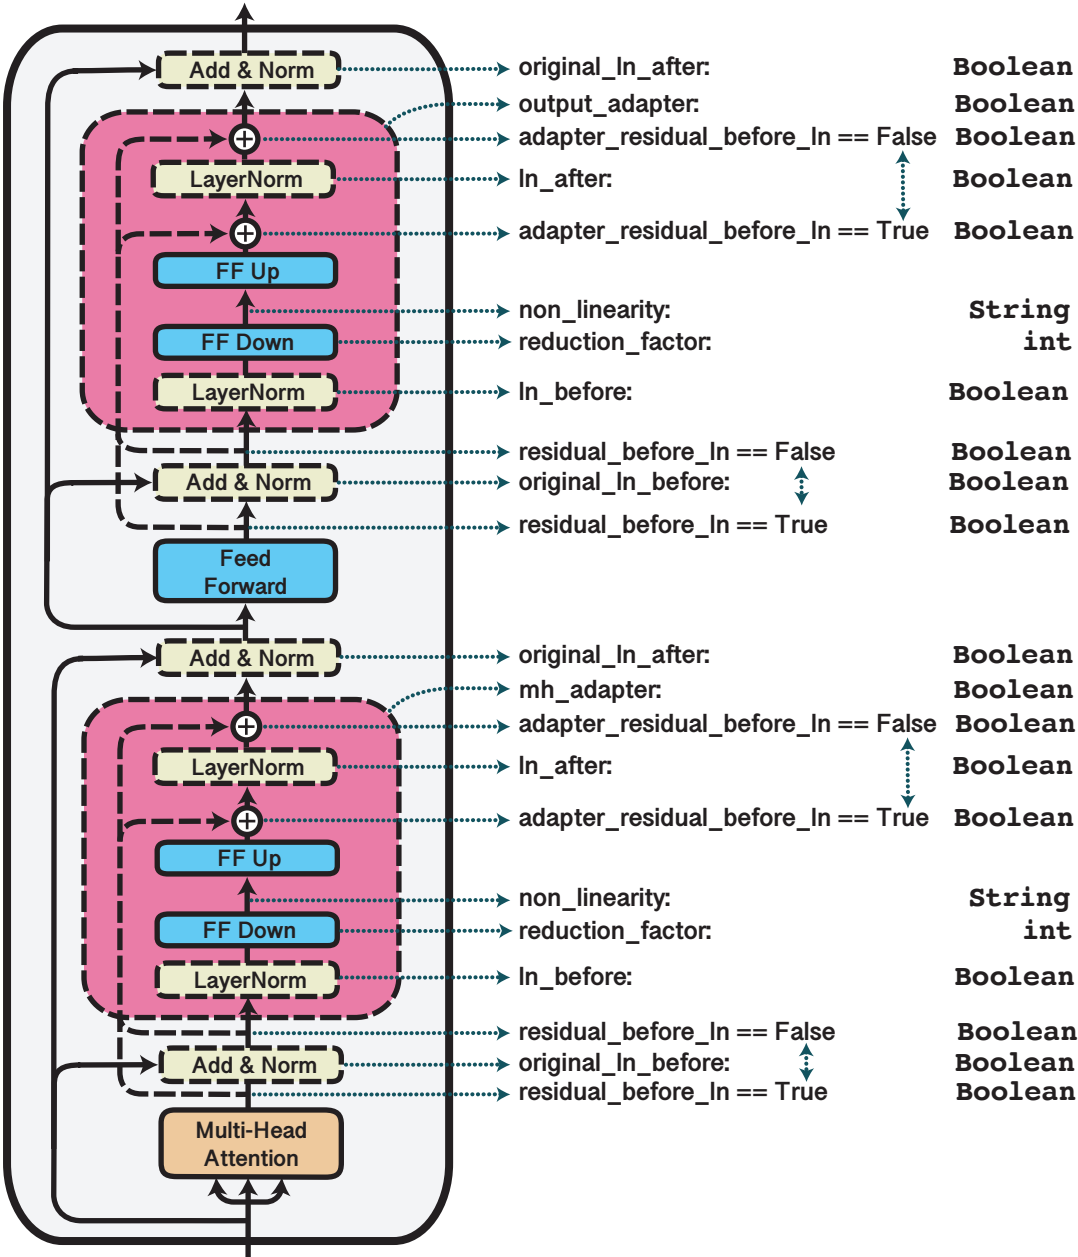

Supplement: OptionalSupplementaryMaterial [file 2020.emnlp-demos.7.OptionalSupplementaryMaterial.zip]

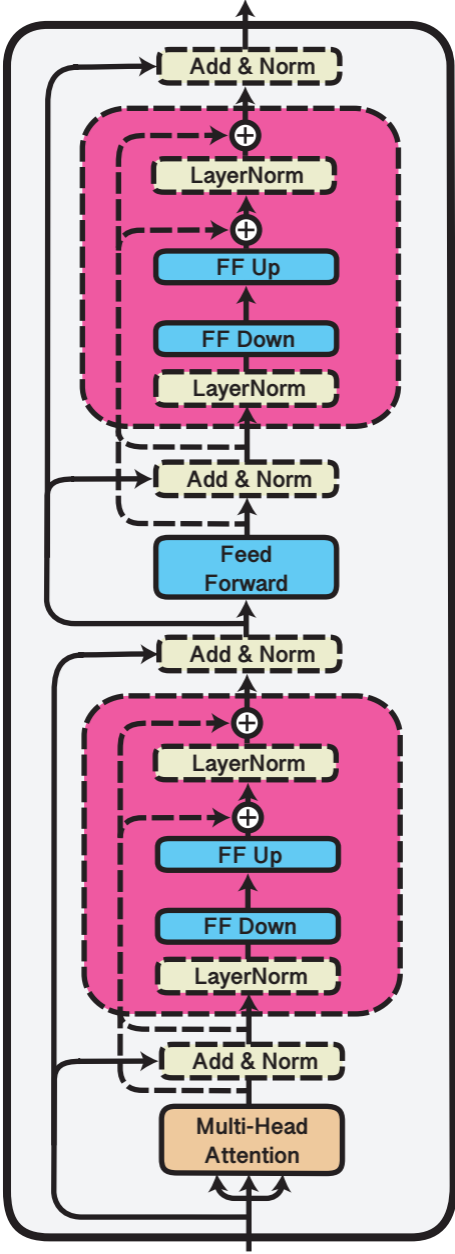

Supplement: OptionalSupplementaryMaterial [file 2020.emnlp-demos.7.OptionalSupplementaryMaterial.zip › img/AdapterHubCombined_left.pdf]

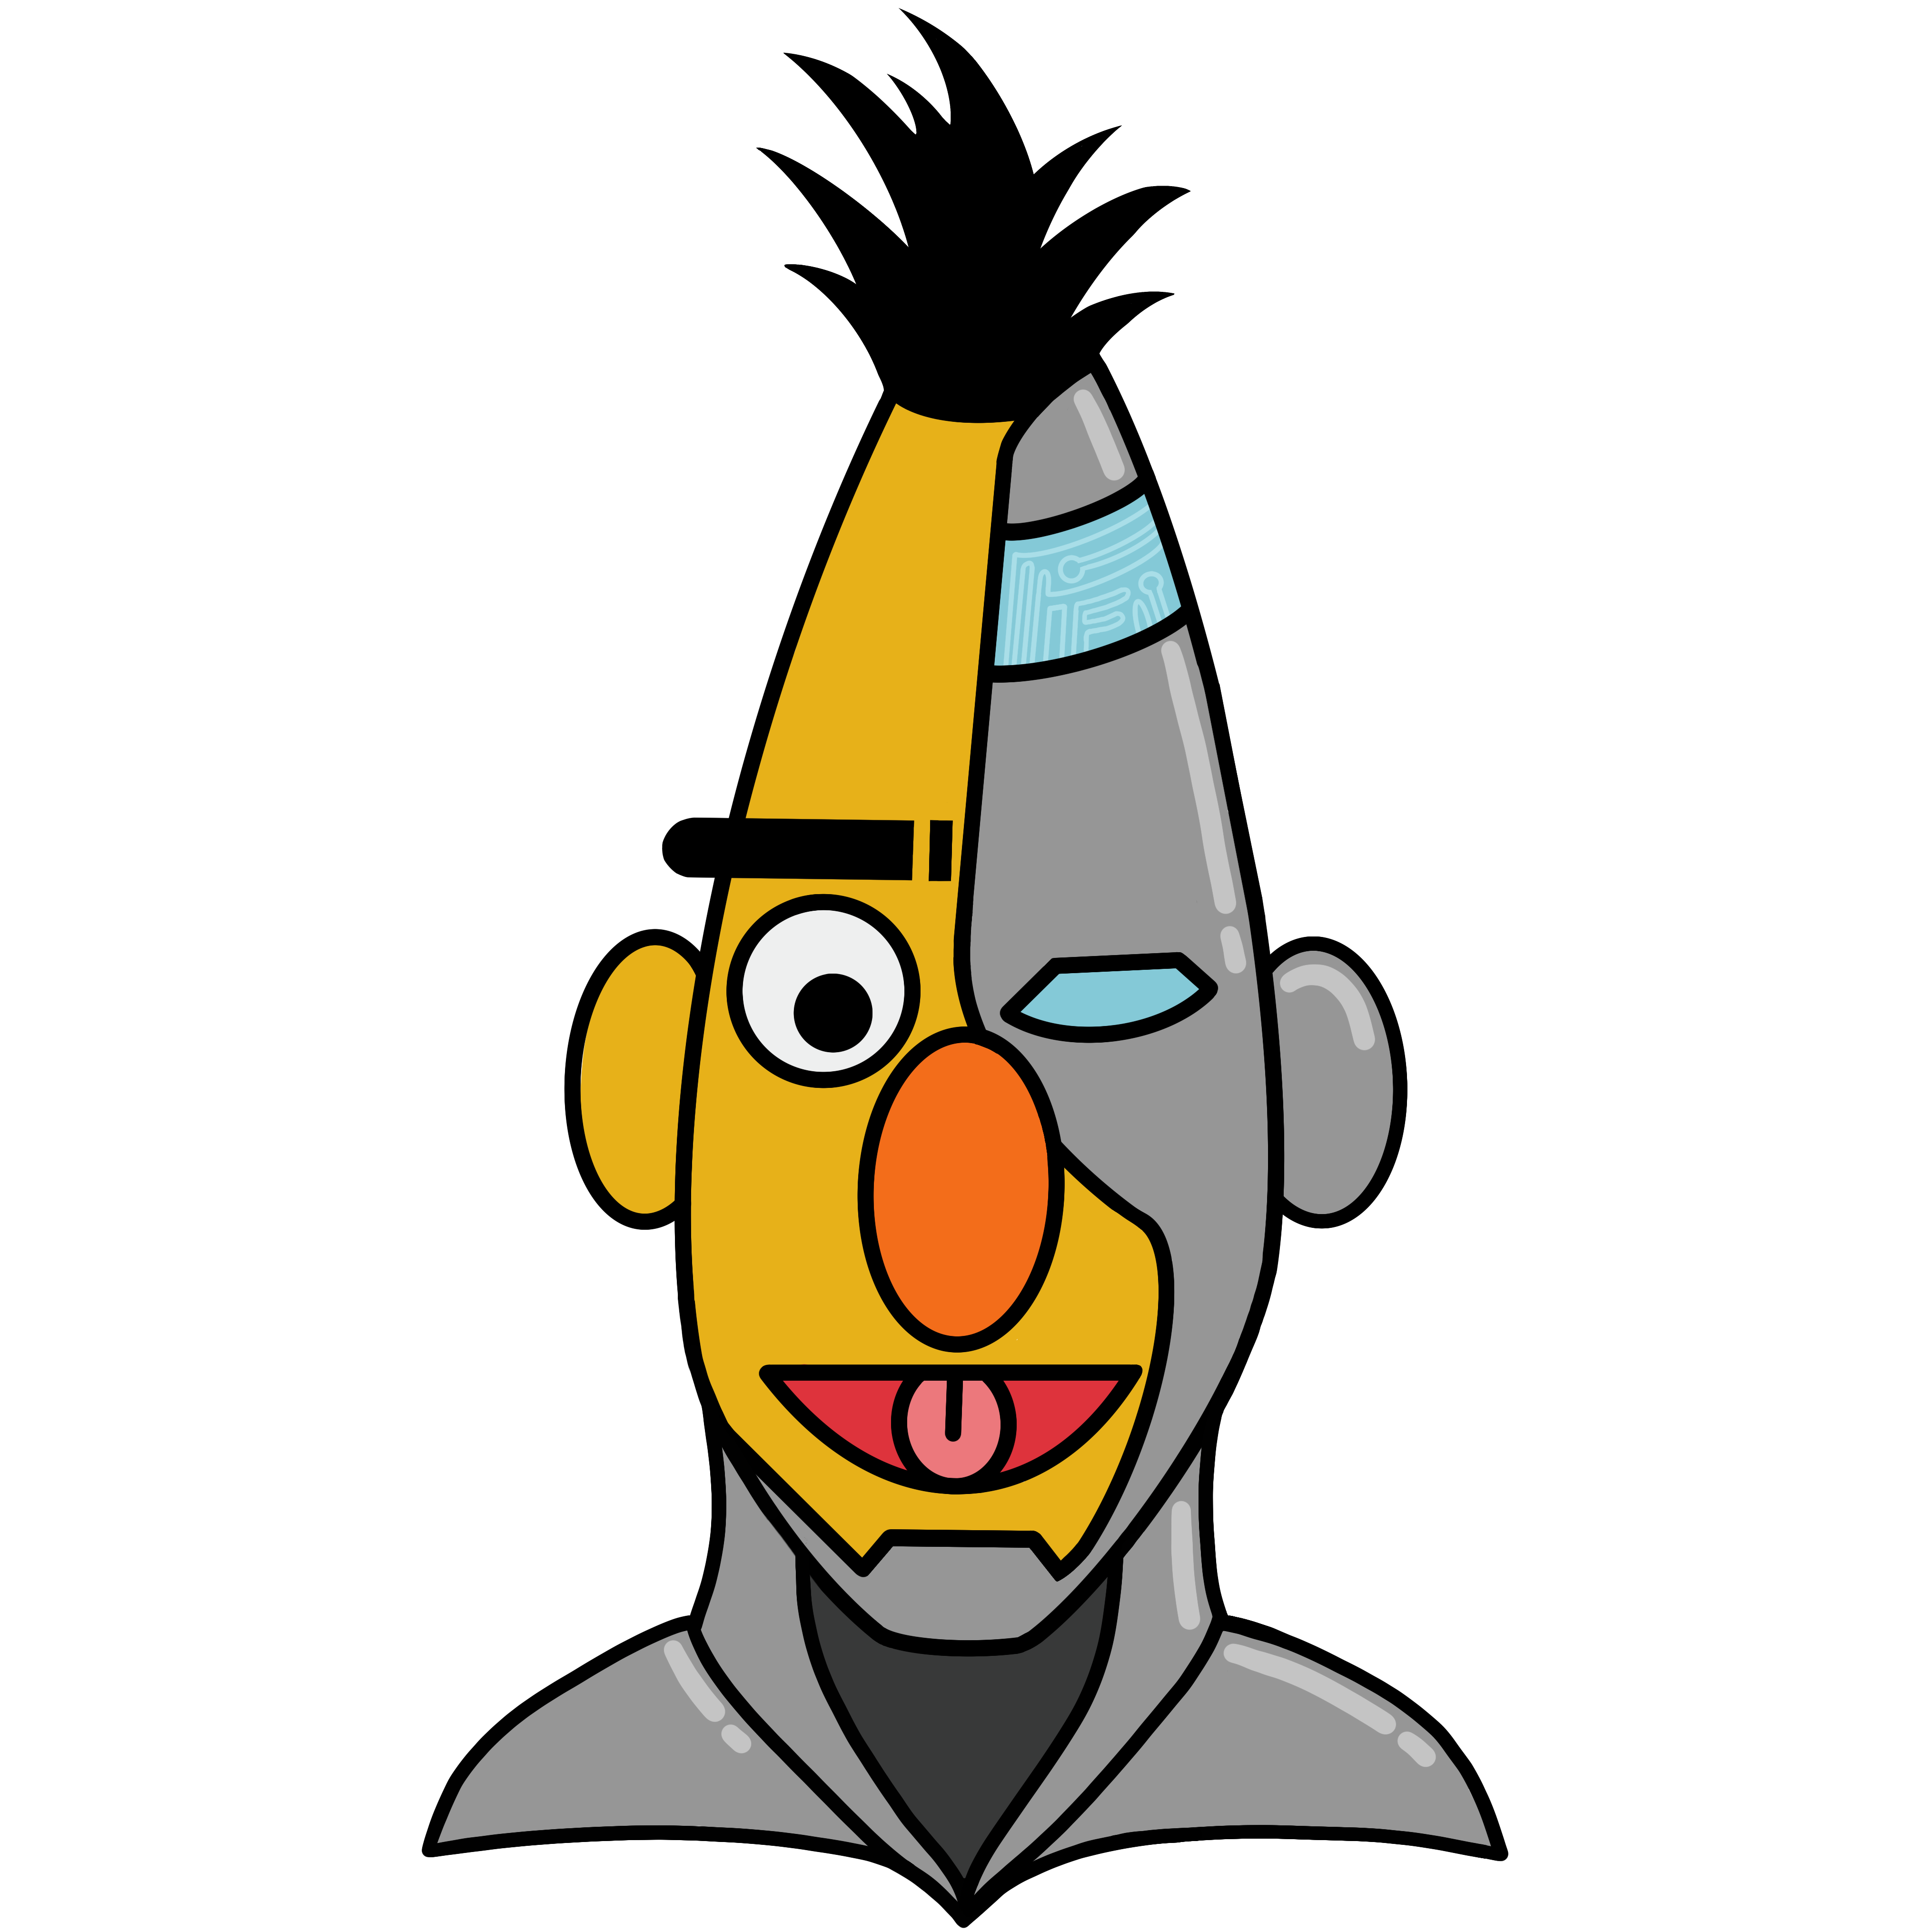

Supplement: OptionalSupplementaryMaterial [file 2020.emnlp-demos.7.OptionalSupplementaryMaterial.zip › img/Logo.png]

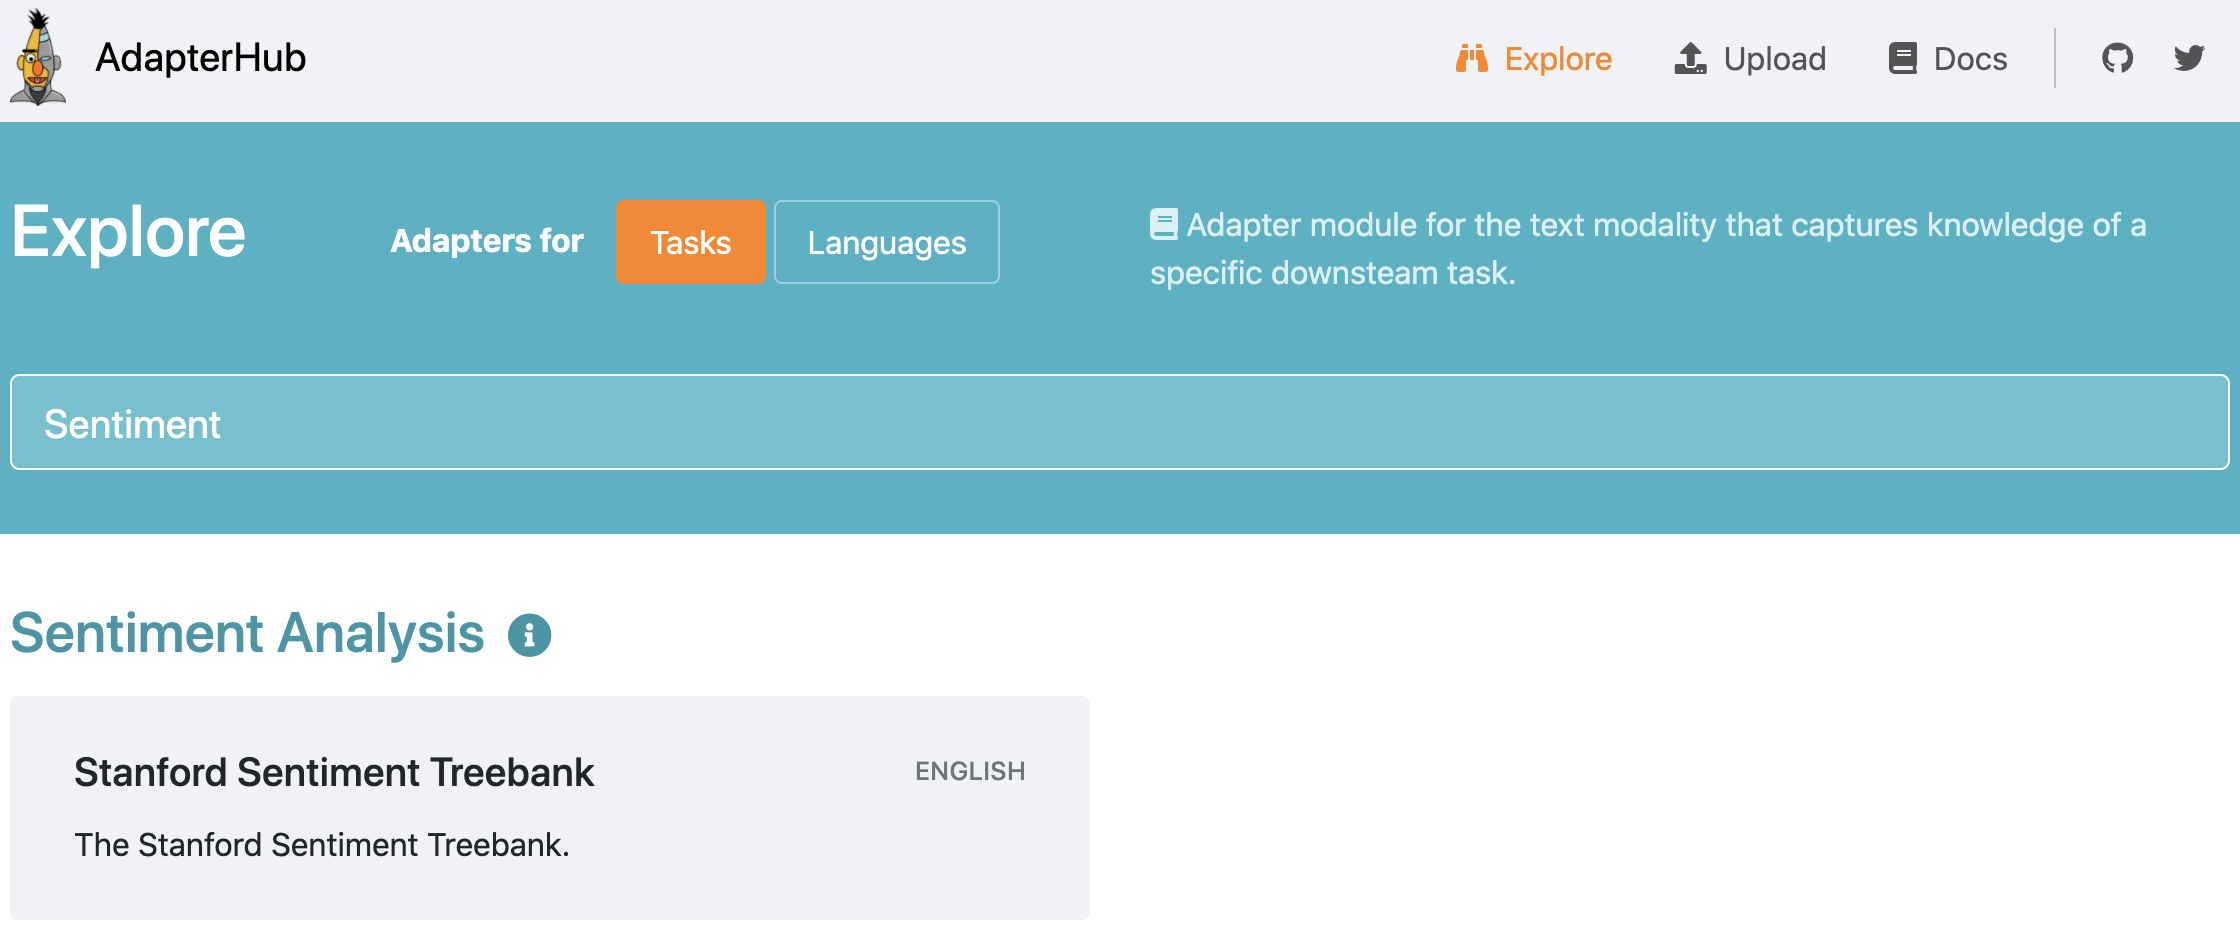

Supplement: OptionalSupplementaryMaterial [file 2020.emnlp-demos.7.OptionalSupplementaryMaterial.zip › img/screen_search.png]
